# Supplementary material
Source: PubMed Central journal article supplement (PMC406481)

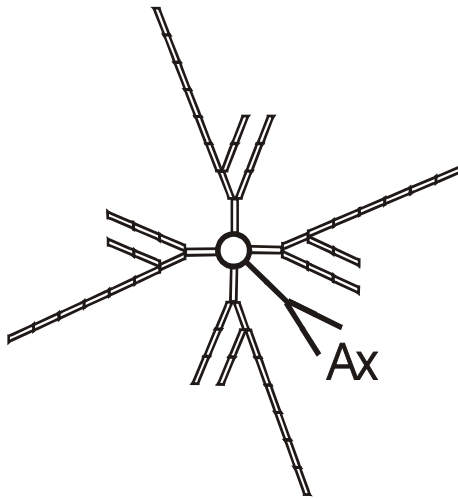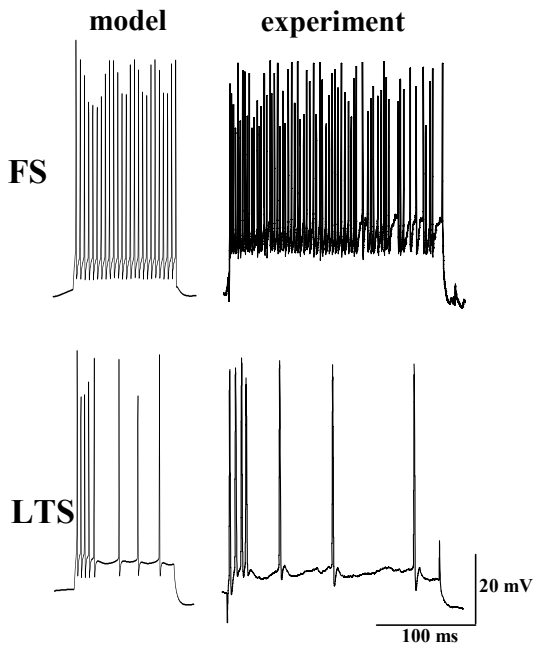

Supplement: pnas_101_18_7152__2.pdf [file pnas_101_18_7152__2.pdf]

model

experiment

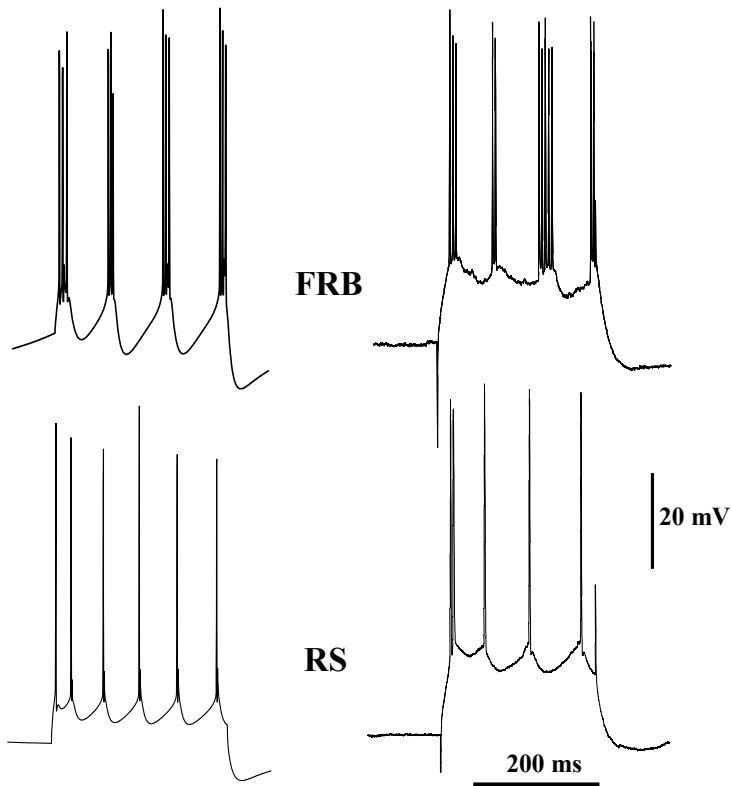

Supplement: pnas_101_18_7152__3.pdf [file pnas_101_18_7152__3.pdf]
